# Supplementary material for: Synergistic impacts of sonolysis aided photocatalytic degradation of water pollutant over perovskite-type CeNiO3nanospheres
Source: Royal Society of Chemistry journal article supplement (doi:10.1039/d2nj01127a), 2022-01-01
Supplement: d2nj01127a1.pdf [file d2nj01127a1.pdf]

## Supporting information

### Synergistic Impacts of Sonolysis Aided Photocatalytic Degradation of Water Pollutant over Perovskite-type CeNiO<sub>3</sub> Nanospheres

Madappa C Maridevaru,<sup>a</sup> Belqasem Aljafari,<sup>b</sup> Sambandam Anandan,<sup>a,\*</sup> Muthupandian Ashokkumar<sup>c</sup>

<sup>a</sup>*Nanomaterials & Solar Energy Conversion Lab, Department of Chemistry, National Institute of Technology, Tiruchirappalli -620015, India. E-mail: [sanand@nitt.edu](mailto:sanand@nitt.edu)*

<sup>b</sup>*Department of Electrical Engineering, College of Engineering, Najran University, Najran 11001, Saudi Arabia.*

<sup>c</sup>*School of Chemistry, University of Melbourne, Vic 3010, Australia.*

| Sl. No. | Content                                                                                                              | Page no. |
|---------|----------------------------------------------------------------------------------------------------------------------|----------|
| 1       | Hydrothermal reaction scheme                                                                                         | 2        |
| 2       | Molecular structure and absorption spectra of OG dye                                                                 | 3        |
| 4       | Time dependence UV-Vis's absorption spectra                                                                          | 4-5      |
| 5       | Sonophotodegradation efficiency plot and pseudo-first-order rate kinetics curve of OG dye using different catalysts. | 6        |
| 6       | Previous study on the sonophotocatalytic degradation of azo dye.                                                     | 7        |
| 7       | References                                                                                                           | 8        |

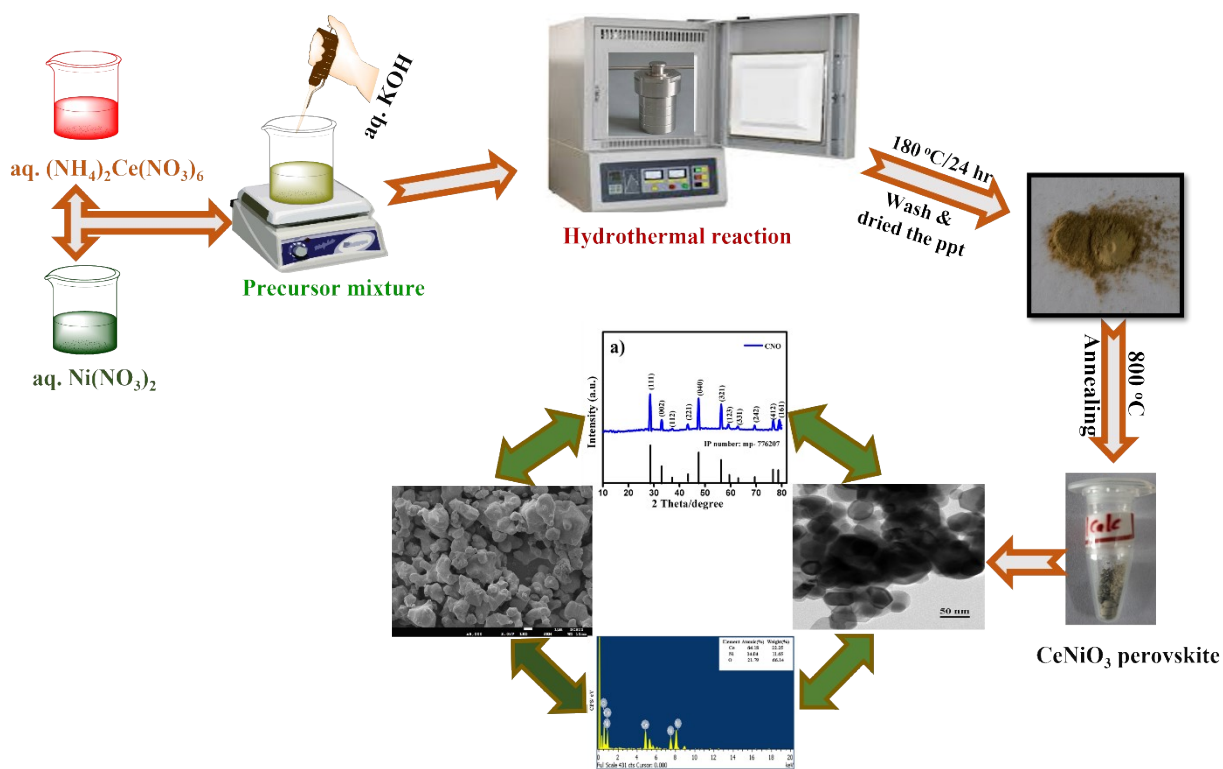

**Scheme S1:** Schematic exemplification of perovskite-type CeNiO<sub>3</sub> nanospheres formation.

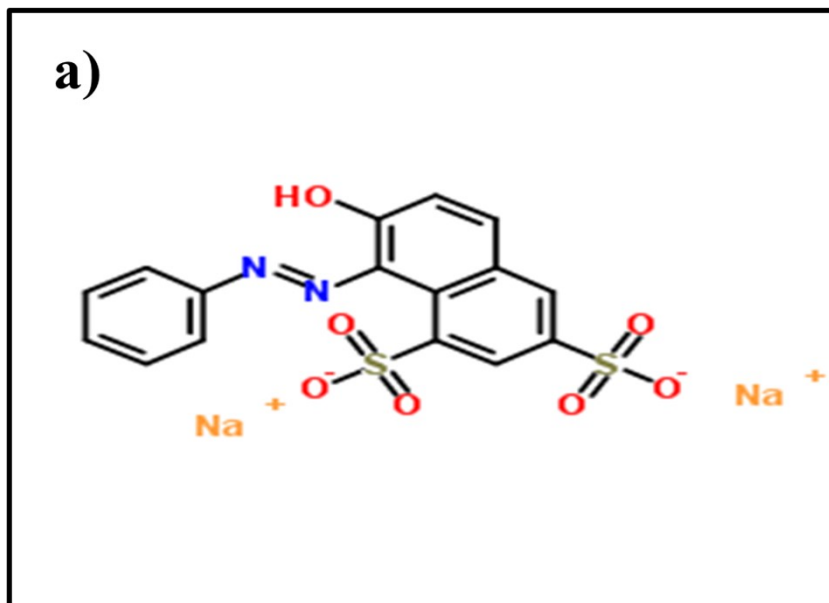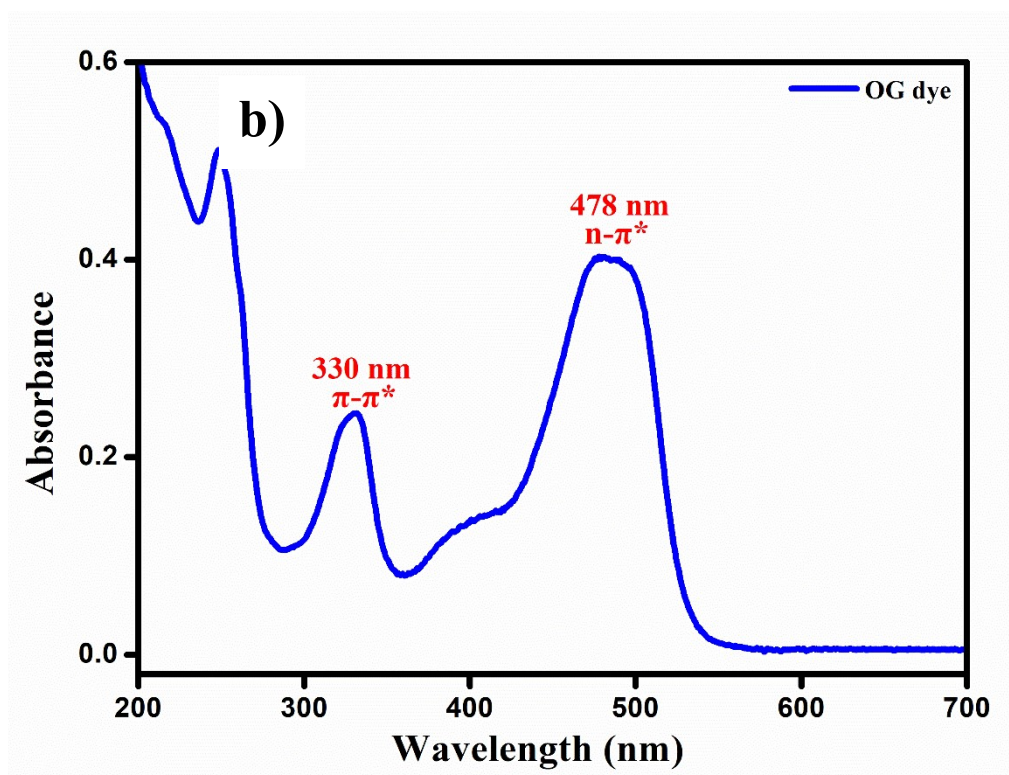

Fig. S1: (a) Molecular structure and (b) absorption spectra of OG dye.

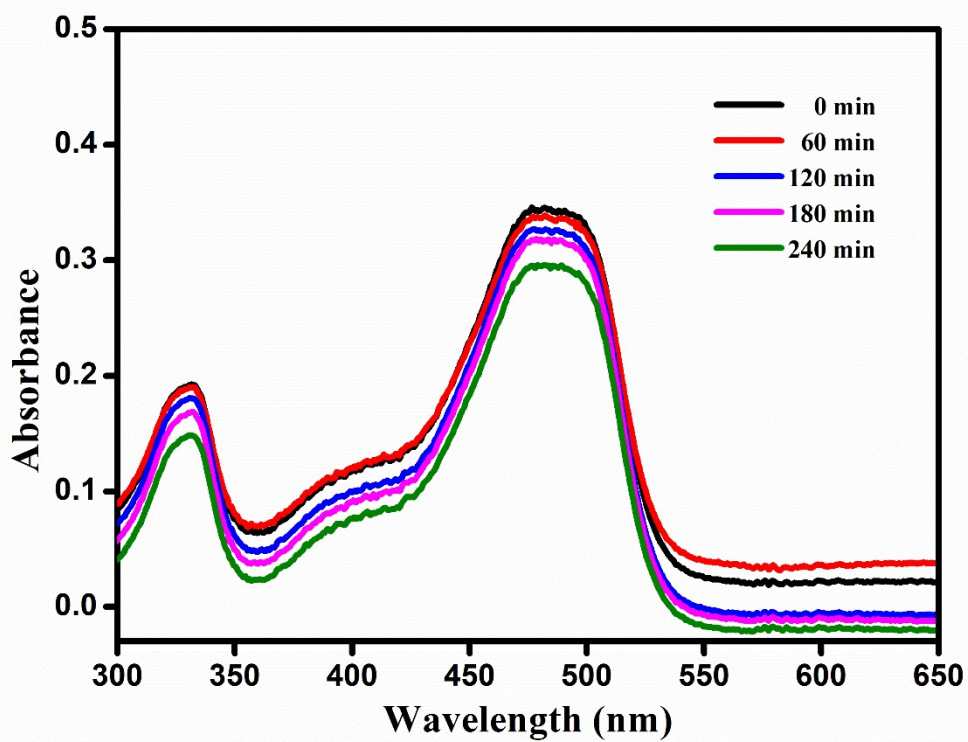

**Fig. S2:** Time-dependence UV-Vis absorption spectra of OG dye adsorption over CNO surface; (OG conc.  $2 \times 10^{-5}$  M, 0.2 g/L catalyst loading at natural pH-9).

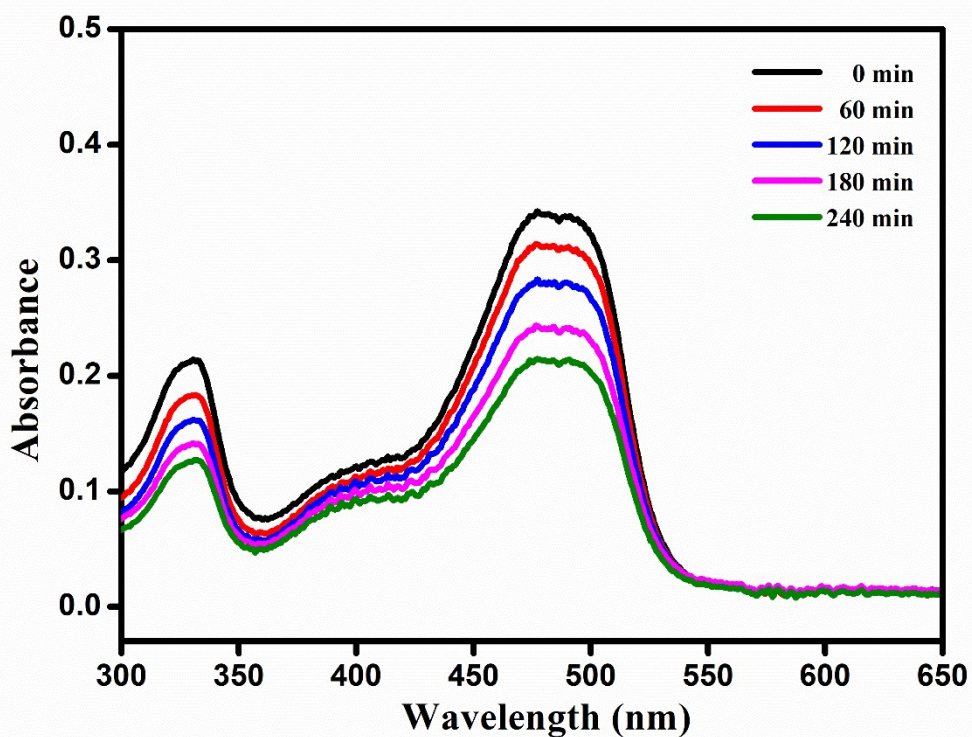

**Fig. S3:** Time-dependence UV-Vis absorption spectra of photocatalytic degradation OG dye over CNO catalyst under visible photon irradiation; (OG conc.  $2 \times 10^{-5}$  M, 0.2 g/L catalyst loading at natural pH-9).

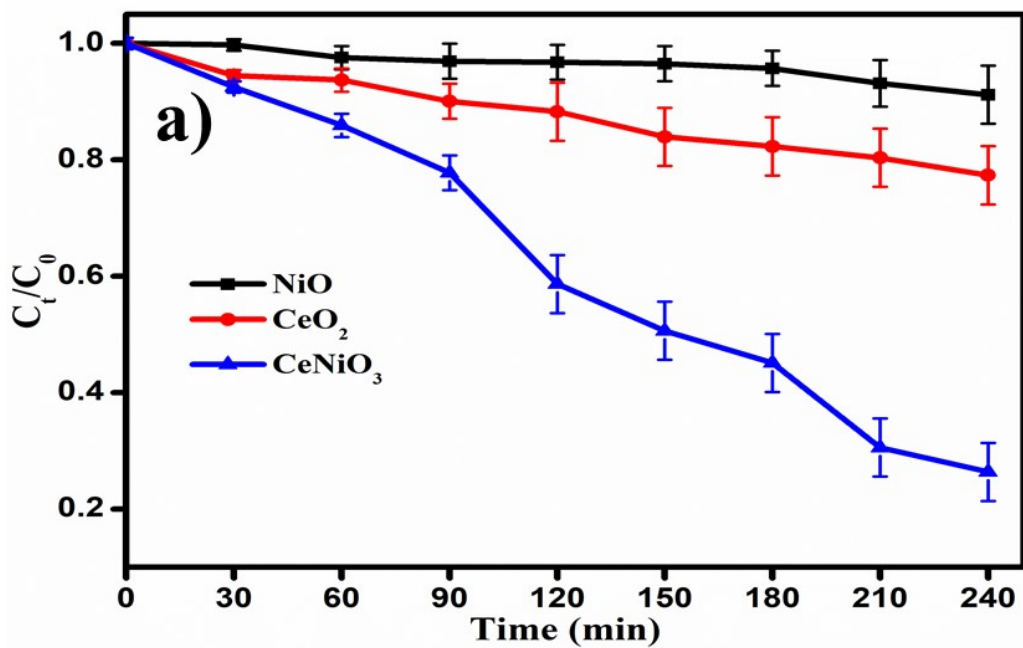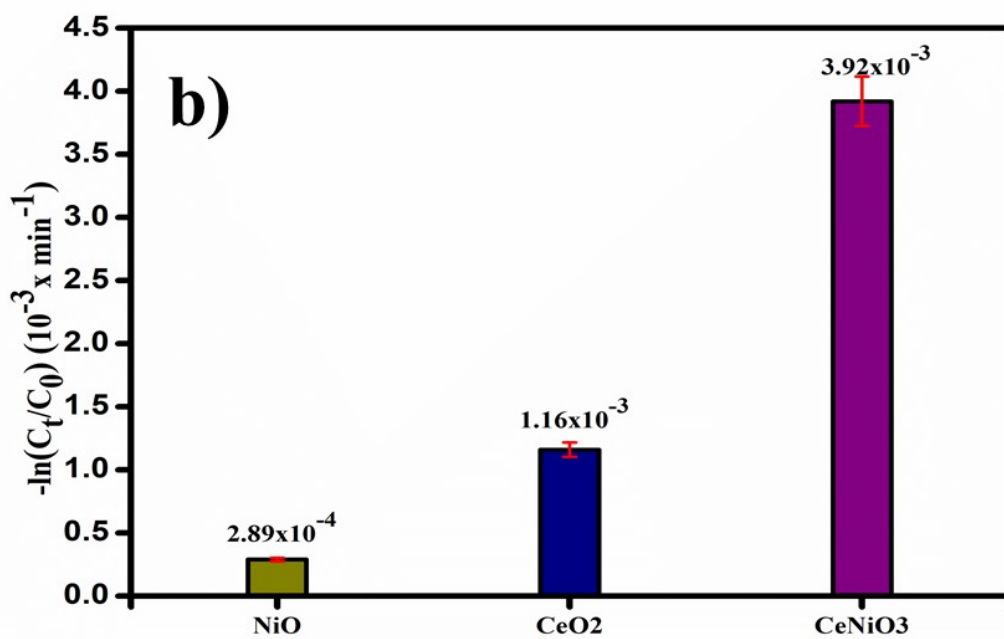

**Fig. S4:** a) Sonophotodegradation efficacy plot and (b) pseudo-first-order rate kinetics plot of OG dye using as-synthesized NiO, CeO<sub>2</sub>, and CNO catalyst samples.



**Table S1:** Previous study on the synergistic influence of sonophotocatalytic degradation of azo dye.

| Catalyst sample                              | Irradiation source                                                                |                                                             | Catalyst dosage | Orange-G dye concentration | Degradation efficiency                                                                                                                                                                       | Ref.         |
|----------------------------------------------|-----------------------------------------------------------------------------------|-------------------------------------------------------------|-----------------|----------------------------|----------------------------------------------------------------------------------------------------------------------------------------------------------------------------------------------|--------------|
|                                              | Light                                                                             | Ultrasonic                                                  |                 |                            |                                                                                                                                                                                              |              |
| Sepiolite/TiO <sub>2</sub> composites        | 300 W Xe lamp (ORIEL,68811 ARC Lamp) with a 365 nm UV pass filter                 | -----                                                       | 0.8 g/L         | 10 mg/L                    | The Orange-G removal efficiency can achieve 98.8% after 150 min of irradiation                                                                                                               | 1            |
| WO <sub>3</sub> -TiO <sub>2</sub> nanohybrid | 150W tungsten halogen lamp ( $\lambda \geq 400$ nm; intensity 80,600 $\pm$ 10 lx) | -----                                                       | 1 g /L          | 3 x 10 <sup>-5</sup> M     | 94% Orange G dye was decolorized in 210 min at neutral pH with WO <sub>3</sub> -TiO <sub>2</sub> nanohybrid                                                                                  | 2            |
| Titanium aminophosphates                     | -----                                                                             | -----                                                       | 150 mg /100 mL  | 1x10 <sup>-4</sup> M       | The degradation efficacy of OG was found to be maximum (97.1 %) at 0.001 M of H <sub>2</sub> O <sub>2</sub> after a period of 250 min.                                                       | 3            |
| FeVO <sub>4</sub>                            | 500 W Xe arc lamp (OSRAM, Germany) and an UV cut filter as Visible source         | -----                                                       | 0.5 g/L         | 5 mg/L                     | The removal of OG dye in an aqueous solution with 15 mmol/L H <sub>2</sub> O <sub>2</sub> at pH 7.0 reached 93.2% 60 min.                                                                    | 4            |
| TiO <sub>2</sub>                             | Xe-arc lamp (450 W, Oriel)                                                        | Sono waves: 213 kHz and 20 W.                               | 1 g/L           | 9 x 10 <sup>-5</sup> M     | Herein, US and UV are combined and significant enhancement in the degradation (85% in 75 min) of OG was observed                                                                             | 5            |
| Fe <sup>3+</sup> / Fe(OH) <sup>2+</sup>      | Xe-arc lamp, $\lambda < 320$ nm                                                   | Sono waves: 213 kHz and 20 W.                               | 0.05mM          | 9 x 10 <sup>-5</sup> M     | Sonophotocatalytic process revealed 40 % of mineralization (TOC) in 240 min.                                                                                                                 | 6            |
| CeNiO <sub>3</sub>                           | UV source (352 nm: 6W)                                                            | US source: 38-160 kHz power of 50 Watt (Kaijo 30110, Japan) | 0.2 g/L         | 2 x 10 <sup>-5</sup> M     | Under optimum conditions, sonophotocatalytic efficacy shows 73.63 % in 240 min, 87 %, and 94.67 % in 180 min, under the UV and US irradiation of 38 kHz, 100 kHz, and 160 kHz, respectively. | Present work |

## References:

- 1) F. Zhou, C. Yan, T. Liang, Q. Sun, H. Wang, Photocatalytic degradation of Orange G using sepiolite-TiO<sub>2</sub> nanocomposites: Optimization of physicochemical parameters and kinetics studies, *Chemical Engineering Science*, 2018. doi: <https://doi.org/10.1016/j.ces.2018.03.016>
- 2) U.O. Bhagwat, K. Raja Kumar, A. Syed, N. Marraiki, V. Ponnusamy, S. Anandan, Facile Hydrothermal Synthesis of Tungsten Trioxide/Titanium Dioxide Nanohybrid Structures as Photocatalyst for Wastewater Treatment Application, *Journal of Cluster Science*, 2021. <https://doi.org/10.1007/s10876-021-02053-0>.
- 3) A. Rajini, M. Nookaraju, S. Chirra, A. Ajay kumar, N. Venkatathri, Titanium aminophosphates: Synthesis, characterization, and Orange G dye degradation studies, *RSC Adv.*, 2015, doi: 10.1039/C5RA19117C.
- 4) X. Ou, J. Yan, F. Zhang, C. Zhang, Accelerated degradation of orange G over a wide pH range in the presence of FeVO<sub>4</sub>, *Ultrasonics Sonochemistry*, 2015, 24, 221–229. doi.org/10.1016/j.ultsonch.2014.11.017.
- 5) J. Madhavan, F. Grieser, M. Ashokkumar, Degradation of orange-G by advanced oxidation processes *Front. Environ. Sci. Eng.* 2018, 12(1), 7. <https://doi.org/10.1007/s11783-018-1013-3>
- 6) J. Madhavan, F. Grieser, M. Ashokkumar, Kinetics of the sonophotocatalytic degradation of orange-G in presence of Fe<sup>3+</sup>, *Water Science & Technology—WST*, 60, 2009, 8. doi: 10.2166/wst.2009.631.
